# Supplementary material for: Burden of malaria in the Comoros, 1990–2021: findings from the global burden of disease study 2021
Source: Front Public Health. 2025 Mar 12;13:1470021. doi: 10.3389/fpubh.2025.1470021 (PMC11937032; doi:10.3389/fpubh.2025.1470021)
Supplement: Supplementary file 9 [file Table_9.xlsx]

## Sheet: supplementary Table 9
Supplementary Table 9 The number of DALYs in different age groups,in 2021.
measure	location	sex	age	cause	metric	year	val	upper	lower
DALYs (Disability-Adjusted Life Years)	Comoros	Both	<5 years	Malaria	Number	2021	218.72	356.30	97.68
DALYs (Disability-Adjusted Life Years)	Comoros	Both	5-9 years	Malaria	Number	2021	68.14	101.81	38.69
DALYs (Disability-Adjusted Life Years)	Comoros	Both	10-14 years	Malaria	Number	2021	64.43	96.32	38.82
DALYs (Disability-Adjusted Life Years)	Comoros	Both	15-19 years	Malaria	Number	2021	286.27	475.44	143.50
DALYs (Disability-Adjusted Life Years)	Comoros	Both	20-24 years	Malaria	Number	2021	266.52	448.55	130.82
DALYs (Disability-Adjusted Life Years)	Comoros	Both	25-29 years	Malaria	Number	2021	166.33	271.05	82.89
DALYs (Disability-Adjusted Life Years)	Comoros	Both	30-34 years	Malaria	Number	2021	140.80	235.56	70.06
DALYs (Disability-Adjusted Life Years)	Comoros	Both	35-39 years	Malaria	Number	2021	129.78	218.44	62.79
DALYs (Disability-Adjusted Life Years)	Comoros	Both	40-44 years	Malaria	Number	2021	105.59	177.60	50.80
DALYs (Disability-Adjusted Life Years)	Comoros	Both	45-49 years	Malaria	Number	2021	89.91	156.39	41.78
DALYs (Disability-Adjusted Life Years)	Comoros	Both	50-54 years	Malaria	Number	2021	75.12	128.09	35.68
DALYs (Disability-Adjusted Life Years)	Comoros	Both	55-59 years	Malaria	Number	2021	58.67	101.88	27.78
DALYs (Disability-Adjusted Life Years)	Comoros	Both	60-64 years	Malaria	Number	2021	40.99	70.35	20.08
DALYs (Disability-Adjusted Life Years)	Comoros	Both	65-69 years	Malaria	Number	2021	29.42	50.41	14.02
DALYs (Disability-Adjusted Life Years)	Comoros	Both	70-74 years	Malaria	Number	2021	25.31	42.79	11.87
DALYs (Disability-Adjusted Life Years)	Comoros	Both	75-79 years	Malaria	Number	2021	8.30	14.08	4.03
DALYs (Disability-Adjusted Life Years)	Comoros	Both	80+ years	Malaria	Number	2021	3.21	5.33	1.65
